# Supplementary material for: Temporal distribution and genetic variants in influenza A(H1N1)pdm09 virus circulating in Mexico, seasons 2012 and 2013
Source: PLoS One. 2017 Dec 8;12(12):e0189363. doi: 10.1371/journal.pone.0189363 (PMC5722308; doi:10.1371/journal.pone.0189363)
Supplement: S1 Table — Viruses from 2013 were coloured in red to indicate the presence of matching HA/NA mutations A141T+N431S or blue to indicate the paired mutation S162I+L206S. Additionally, viruses with other mutations in NA were coloured in green for L206S+N341S; yellow I321V; pink I341V+K432E; or orange for viruses without any of the previous. (XLSX) [file pone.0189363.s001.xlsx]

## Sheet: Hoja1
		2012	2013	TOTAL
	Numero de muestras enviados (Enviados por el LERE Yucatán)	241	167*
	Casos registrados Yucatán positivos a H1 pdm09 (fuente: DGE)	76	176	252
	Positivos H1 pdm09 (Enviados por el LERE Yucatán)	48	91	139
	AISLAMIENTOS POR CULTIVO	35	45	70
	SECUENCIAS HA	21	26	47
	SECUENCIAS NA	16	35	51
	* Este dato esta incompleto, faltan agregar los casos negativos.

## Sheet: Hoja3
				HA
		2012			2013				2012			2013
	ID	Month	ACCESION	ID	Month	ACCESION		ID	Month	ACCESION	ID	Month	ACCESION
	A/Yuc/7/2012	January	EPI583171	A/Yuc/66/2013	May	EPI592198		A/Yuc/7/2012	January	EPI583172	A/Yuc/66/2013	May	EPI592213
	A/Yuc/14/2012	January	EPI590981	A/Yuc/79/2013	June	EPI592301		A/Yuc/18/2012	January	EPI590983	A/Yuc/79/2013	June	EPI592308
	A/Yuc/18/2012	January	EPI590982	A/Yuc/80/2013	June	EPI592467		A/Yuc/24/2012	January	EPI590985	A/Yuc/80/2013	June	EPI592479
	A/Yuc/24/2012	January	EPI590984	A/Yuc/81/2013	June	EPI592522		A/Yuc/25/2012	January	EPI590987	A/Yuc/81/2013	June	EPI592523
	A/Yuc/25/2012	January	EPI590986	A/Yuc/82/2013	June	EPI592575		A/Yuc/26/2012	January	EPI590989	A/Yuc/82/2013	June	EPI592583
	A/Yuc/26/2012	January	EPI590988	A/Yuc/116/2013	July	EPI592613		A/Yuc/45/2012	January	EPI590991	A/Yuc/83/2013	June	EPI594514
	A/Yuc/45/2012	January	EPI590990	A/Yuc/124/2013	July	EPI592646		A/Yuc/46/2012	January	EPI590993	A/Yuc/86/2013	June	EPI650077
	A/Yuc/46/2012	January	EPI590992	A/Yuc/128/2013	July	EPI592657		A/Yuc/51/2012	January	EPI590996	A/Yuc/97/2013	June	EPI594967
	A/Yuc/49/2012	January	EPI590994	A/Yuc/133/2013	July	EPI592662		A/Yuc/70/2012	February	EPI591014	A/Yuc/101/2013	June	EPI594968
	A/Yuc/51/2012	January	EPI590995	A/Yuc/134/2013	July	EPI592664		A/Yuc/85/2012	February	EPI590999	A/Yuc/102/2013	June	EPI594969
	A/Yuc/59/2012	February	EPI590997	A/Yuc/135/2013	July	EPI592666		A/Yuc/86/2012	February	EPI591001	A/Yuc/104/2013	June	EPI594970
	A/Yuc/85/2012	February	EPI590998	A/Yuc/137/2013	July	EPI592897		A/Yuc/90/2012	February	EPI591015	A/Yuc/113/2013	July	EPI594971
	A/Yuc/86/2012	February	EPI591000	A/Yuc/138/2013	July	EPI592899		A/Yuc/91/2012	February	EPI591003	A/Yuc/116/2013	July	EPI592614
	A/Yuc/91/2012	February	EPI591002	A/Yuc/141/2013	July	EPI594482		A/Yuc/92/2012	February	EPI591005	A/Yuc/123/2013	July	EPI594974
	A/Yuc/92/2012	February	EPI591004	A/Yuc/150/2013	July	EPI594484		A/Yuc/102/2012	February	EPI591007	A/Yuc/124/2013	July	EPI592649
	A/Yuc/102/2012	February	EPI591006	A/Yuc/152/2013	July	EPI594486		A/Yuc/103/2012	February	EPI591009	A/Yuc/128/2013	July	EPI592658
	A/Yuc/103/2012	February	EPI591008	A/Yuc/157/2013	July	EPI594488					A/Yuc/133/2013	July	EPI592663
	A/Yuc/109/2012	February	EPI591010	A/Yuc/214/2013	August	EPI594493					A/Yuc/134/2013	July	EPI592665
	A/Yuc/110/2012	February	EPI591011	A/Yuc/243/2013	August	EPI594496					A/Yuc/135/2013	July	EPI592667
	A/Yuc/111/2012	February	EPI591012	A/Yuc/250/2013	August	EPI594498					A/Yuc/137/2013	July	EPI592898
	A/Yuc/145/2012	March	EPI591013	A/Yuc/260/2013	August	EPI594500					A/Yuc/138/2013	July	EPI592900
				A/Yuc/286/2013	September	EPI594502					A/Yuc/141/2013	July	EPI594483
				A/Yuc/293/2013	Setember	EPI594504					A/Yuc/150/2013	July	EPI594485
				A/Yuc/317/2013	September	EPI594506					A/Yuc/152/2013	July	EPI594487
				A/Yuc/329/2013	September	EPI594508					A/Yuc/157/2013	July	EPI594489
				A/Yuc/374/2013	October	EPI594510					A/Yuc/214/2013	August	EPI594494
											A/Yuc/243/2013	August	EPI594497
				A141T							A/Yuc/250/2013	August	EPI594499
				S162I							A/Yuc/260/2013	August	EPI594501
				None							A/Yuc/286/2013	September	EPI594503
											A/Yuc/293/2013	September	EPI594505
											A/Yuc/317/2013	September	EPI594507
											A/Yuc/329/2013	September	EPI594509
											A/Yuc/346/2013	September	EPI594512
											A/Yuc/374/2013	October	EPI594511
											N341S
											L206S + N341S
											I321V
											L206S
											I34V+K432E
											None
